# Supplementary material for: A general and rapid approach to hybrid metal nanoparticle–ZnO nanowire arrays and their use as active substrates for surface-enhanced Raman scattering detection
Source: Royal Society of Chemistry journal article supplement (doi:10.1039/c5ra24113h), 2015-12-18
Supplement: c5ra24113h1.pdf [file c5ra24113h1.pdf]

# Supporting Information for

## A General and Rapid Approach to Hybrid Metal Nanoparticle-ZnO Nanowire Arrays and Their Use as Active Substrates for Surface- Enhanced Raman Scattering Detection

Qiyang Hu,<sup>a,b</sup> Xiaowang Liu,<sup>a</sup> Chaoting Wu,<sup>a</sup> Qing You,<sup>a</sup> Tianchao Shi<sup>a</sup> and Wu Zhang<sup>\*a</sup>

a. College of Chemistry and Materials Science, Anhui Normal University, Key Laboratory of Functional Molecular Solids, Ministry of Education, Anhui Laboratory of Molecule-Based Materials, Wuhu 241000, P.R. China

b. College of Pharmacy, Wannan Medical College, Wuhu 241002, PR China.

\*E-mail: zhangwu@mail.ahnu.edu.cn

### Contents

**Fig. S1.** XPS spectra of Cu-ZnO@Zn (a) and Ag-ZnO@Zn (b) by using a monochromated x-ray source. Insets: the XPS profiles of Cu 2p and Ag 3d.

**Fig. S2.** SEM image of ZnO NW arrays grown on ITO (top-view) after being immersed into an aqueous of CuCl<sub>2</sub> (5 mM) for 15s.

**Fig. S3.** SEM image of annealed ZnO@Zn NW arrays (400 °C, 5 h under atmosphere) grown on the Zn foil after being immersed into an aqueous of CuCl<sub>2</sub> (5 mM) for 15s.

**Fig. S4.** EDS spectra of hybrid metal-ZnO NW arrays (metal = Ag, Au, Pt and Ni) prepared by inserting the ZnO@Zn arrays into corresponding metal precursor solution for 15s.

**Fig. S5.** UV-Visible absorption profiles of metal-ZnO NW arrays. Note that all hybrid ZnO NW arrays were prepared by inserting the ZnO@Zn substrates into corresponding metal ion solution for 15 s. (b)-(e) Enlarged absorption profiles for Ag-ZnO@Zn, Au-ZnO@Zn, Cu-ZnO@Zn and pure ZnO@Zn.

**Fig. S6.** Raman spectrum of Rh 6G (5 μL, 10<sup>-2</sup> M) by using a ZnO@Zn array (no SERS effect) as the substrate for the measurement.

**Fig. S7.** Close TEM observation image of a composite nanowire obtained from the hybrid Ag-ZnO NW array. The image indicates that the surface of the nanowire is formed by the aggregation of Ag nanoparticles.

**Fig. S8.** The Raman spectrum of pure ZnO@Zn. Note that the bands may derive from the scattering of the ZnO NWs or Zn foil.

**Fig. S9.** SERS spectra of Rh 6G (5  $\mu\text{L}$ ,  $1 \times 10^{-12}$  M) probed from 60 points obtained by using the line-mapping mode at a 1  $\mu\text{m}$  step size from a Ag-ZnO@Zn array (a) and histograms of the intensities of the main Raman vibrations at (b) 1367, (c) 1515 and (d) 1654  $\text{cm}^{-1}$ .

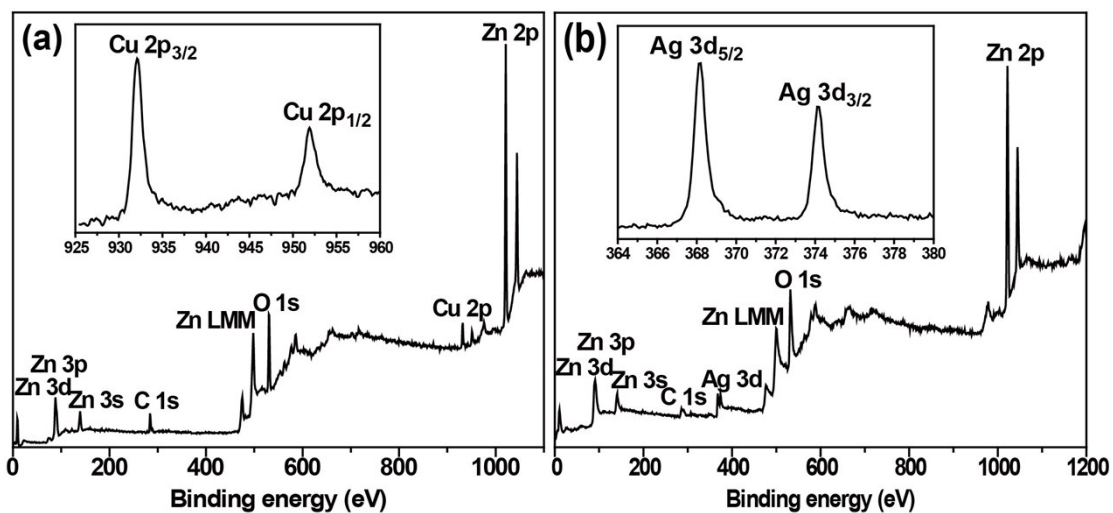

**Fig. S1.** XPS spectra of Cu-ZnO@Zn (a) and Ag-ZnO@Zn (b) by using a monochromated x-ray source. Insets: XPS profiles of Cu 2p and Ag 3d.

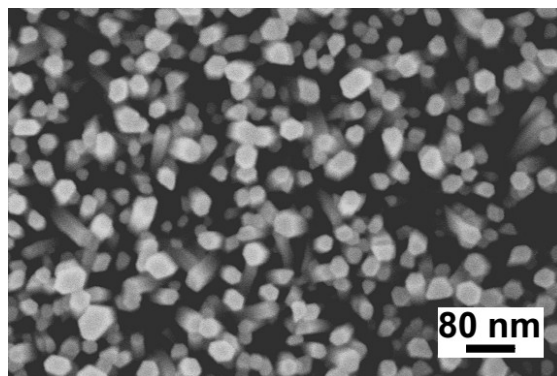

**Fig. S2.** SEM image of ZnO NW arrays grown on ITO (top-view) after being immersed into an aqueous solution of  $\text{CuCl}_2$  (5 mM) for 15s.

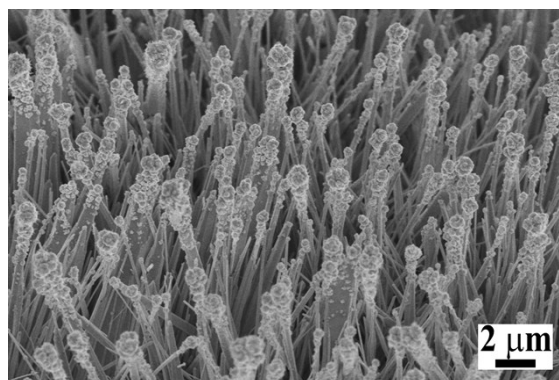

**Fig. S3.** SEM image of annealed ZnO@Zn NW arrays (400 °C, 5 h under atmosphere) grown on the Zn foil after being immersed into an aqueous solution of CuCl<sub>2</sub> (5 mM) for 15s.

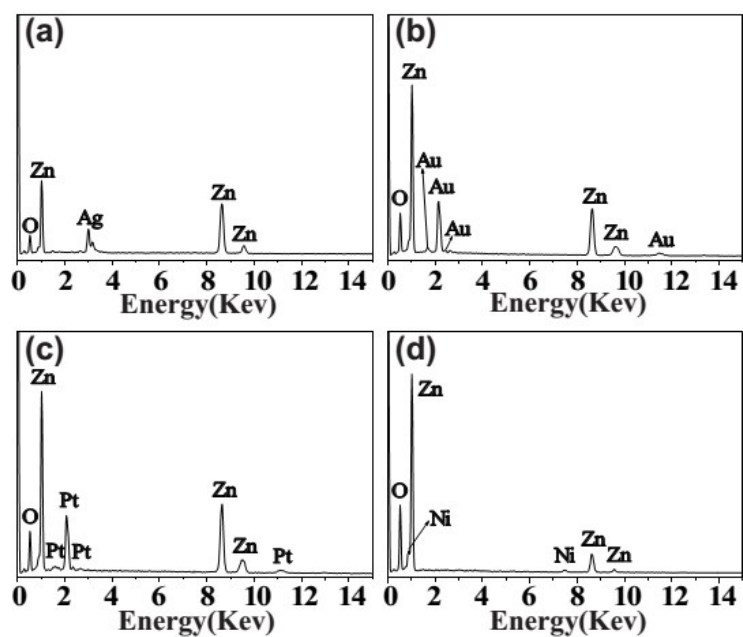

**Fig. S4.** EDS spectra of hybrid metal-ZnO NW arrays (metal = Ag, Au, Pt and Ni) prepared by inserting ZnO@Zn arrays into corresponding metal precursor solution for 15s.

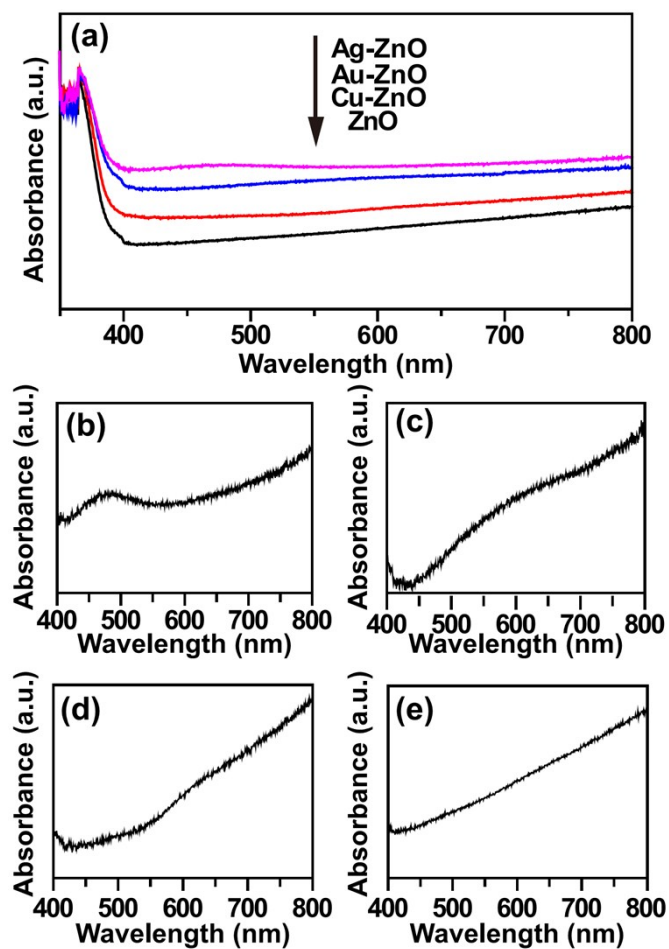

**Fig. S5.** UV-Visible absorption profiles of metal-ZnO NW arrays. Note that all hybrid ZnO NW arrays were prepared by inserting the ZnO@Zn substrates into corresponding metal ion solution for 15 s. (b)-(e) Enlarged absorption profiles for Ag-ZnO@Zn, Au-ZnO@Zn, Cu-ZnO@Zn and pure ZnO@Zn.

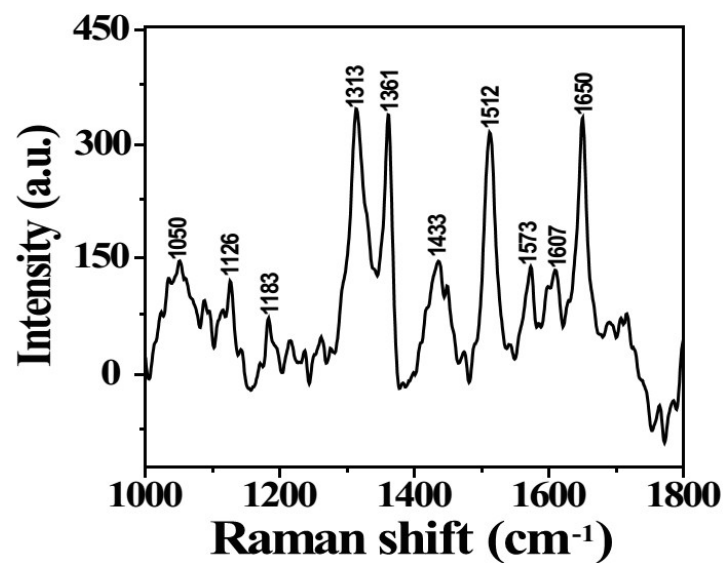

**Fig. S6.** Raman spectrum of Rh 6G (5  $\mu\text{L}$ ,  $10^{-2}$  M) by using a ZnO@Zn array (no SERS effect) as the substrate for the measurement.

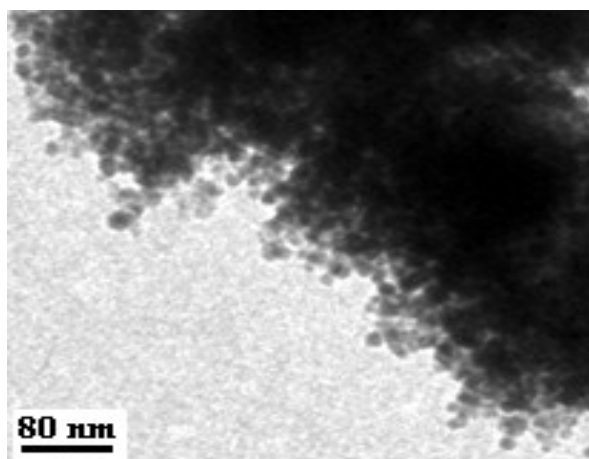

**Fig. S7.** Close TEM observation of a nanowire obtained from the hybrid Ag-ZnO NW array. The image indicates that the surface of the nanowire is formed by the aggregation of Ag nanoparticles.

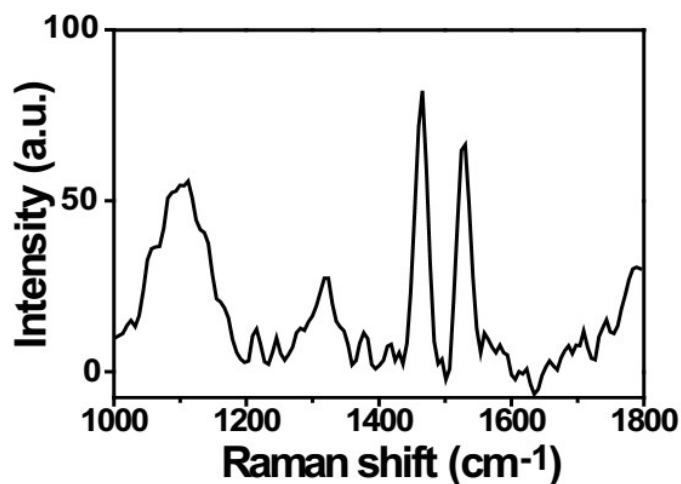

**Fig. S8.** The Raman spectrum of pure ZnO@Zn. Note that the bands may derive from the scattering of the ZnO NWs or Zn foil.

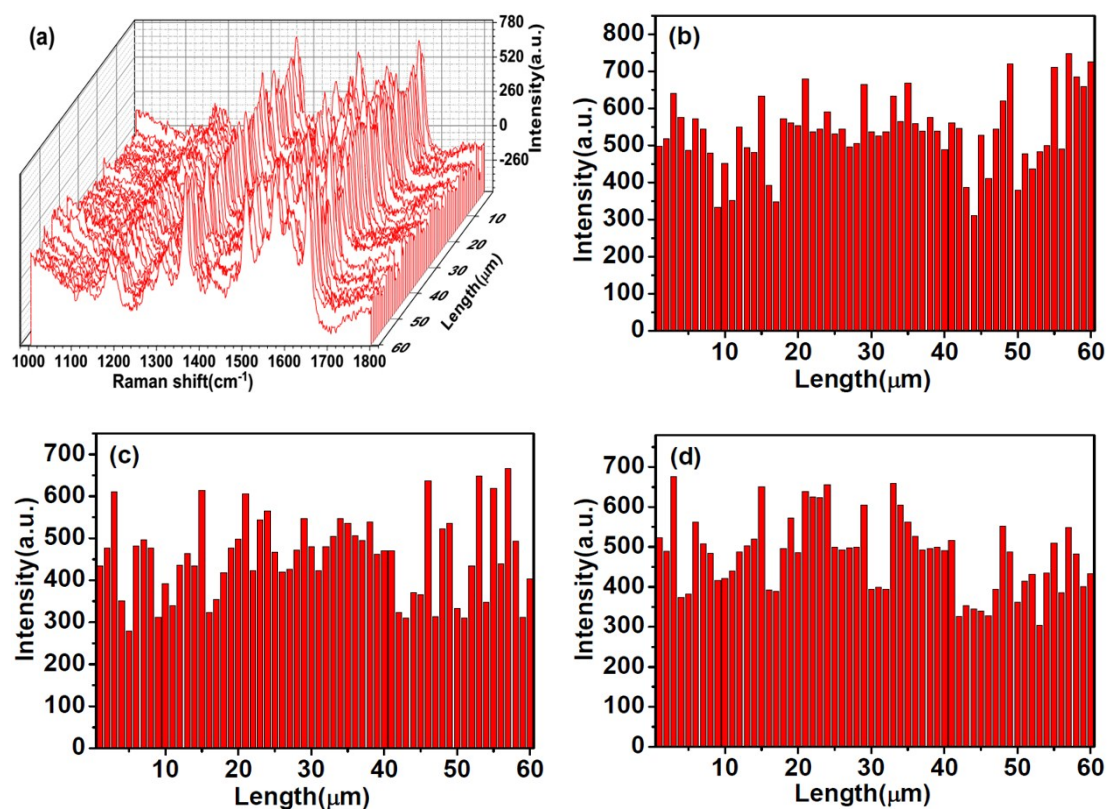

**Fig. S9.** SERS spectra of Rh 6G ( $5 \mu\text{L}$ ,  $1 \times 10^{-12} \text{ M}$ ) probed from 60 points obtained by using the line-mapping mode at a  $1 \mu\text{m}$  step size from a Ag-ZnO@Zn array (a) and histograms (b-c) of the intensities of the main Raman vibrations at  $1367$ ,  $1515$  and  $1654 \text{ cm}^{-1}$ , respectively.
